# Supplementary material for: Three-component 1D and 2D metal phosphonates: structural variability, topological analysis and catalytic hydrocarboxylation of alkanes
Source: Royal Society of Chemistry journal article supplement (doi:10.1039/c7ra00738h), 2017-01-01
Supplement: c7ra00738h1.pdf [file c7ra00738h1.pdf]

## **Electronic Supplementary Information**

**For**

**Three-Component 1D and 2D Metal Phosphonates: Structural  
Variability, Topological Analysis and Catalytic Hydrocarboxylation of  
Alkanes**

**By**

**Konstantinos D. Demadis, Zafeiria Anagnostou, Aggeliki Panera,  
Gellert Mezei, Marina V. Kirillova, and Alexander M. Kirillov**

## 1. TGA traces for all compounds

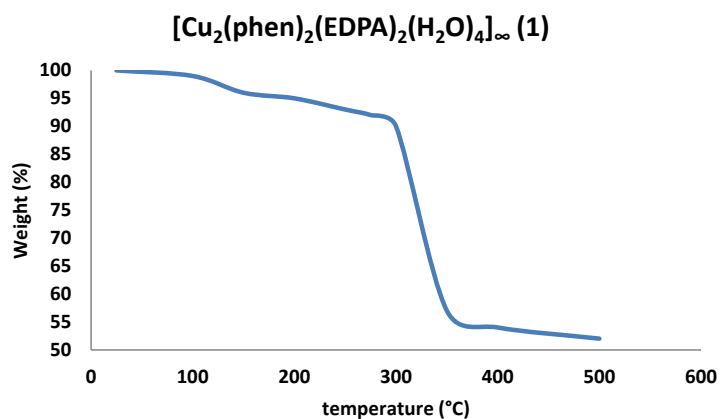

Figure S-1. TGA trace for  $[\text{Cu}_2(\text{phen})_2(\text{EDPA})_2(\text{H}_2\text{O})_4]_\infty$  (**1**).

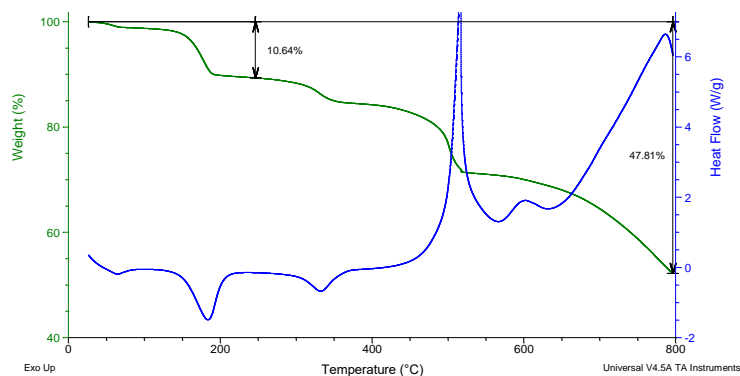

Figure S-2. TGA trace for  $[\text{Co}(\text{phen})(\text{EDPA})(\text{H}_2\text{O})_2]_\infty$  (**1a**).

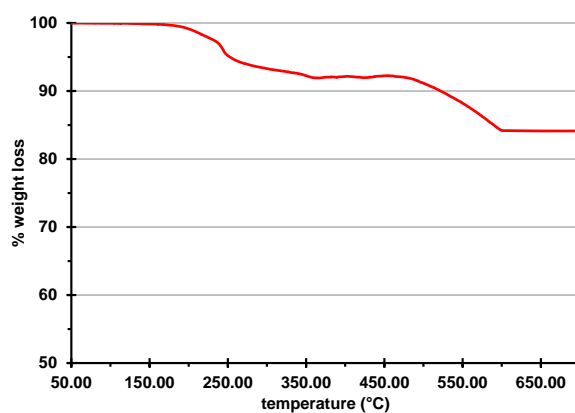

Figure S-3. TGA trace for  $\{[\text{Cu}(\text{phen})(\text{MDPA})] \cdot \text{H}_2\text{O}\}_\infty$  (**2**).

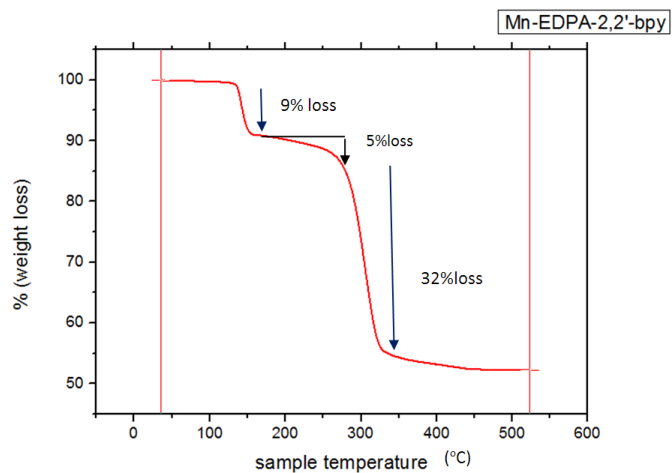

Figure S-4. TGA trace for  $[\text{Mn}(\text{bpy})(\text{EDPA})(\text{H}_2\text{O})_2]_\infty$  (3).

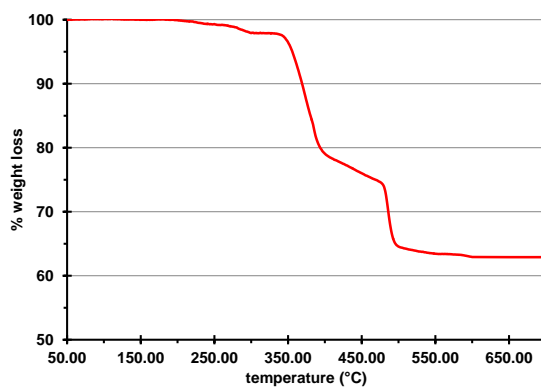

Figure S-5. TGA trace for  $[\text{Zn}(\text{bpy})(\text{EDPA})]_\infty$  (4).

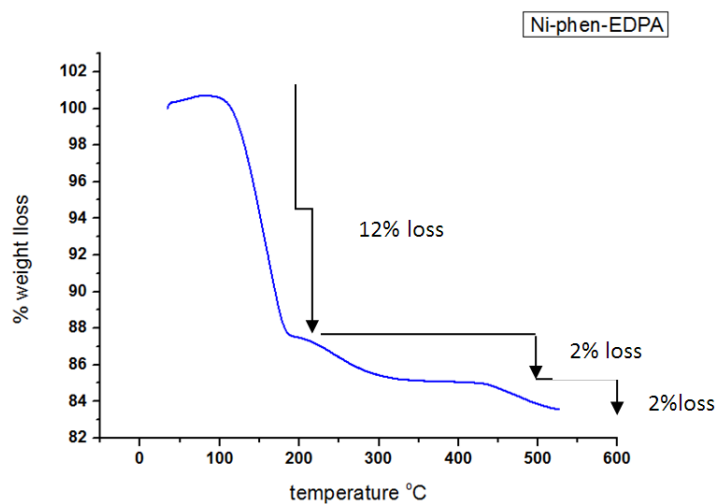

Figure S-6. TGA trace for  $[\text{Ni}(\text{phen})(\text{H}_2\text{O})_4](\text{EDPA})$  (5).



## 2. Calculated and measured powder XRD patterns for all compounds.

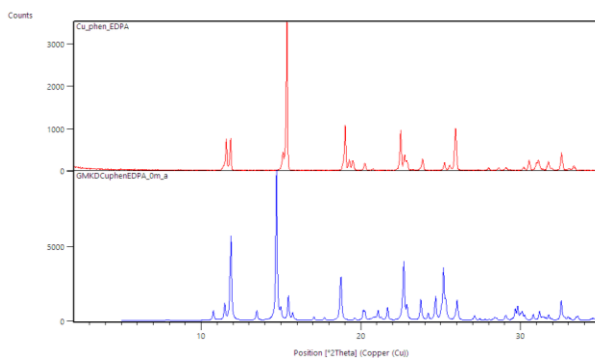

**Figure S-X.** Calculated (blue, lower) and measured (red, upper) powder XRD powder patterns for  $[\text{Cu}_2(\text{phen})_2(\text{EDPA})_2(\text{H}_2\text{O})_4]_\infty$  (**1**).

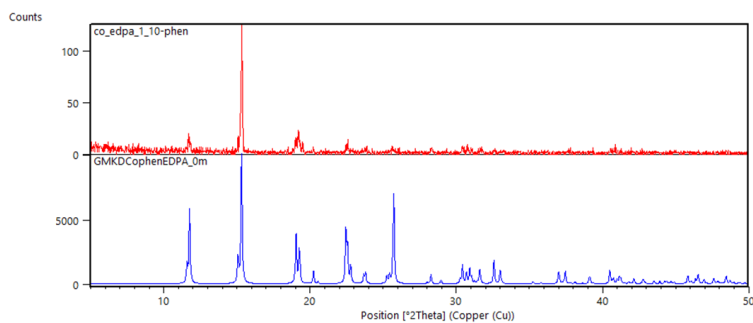

**Figure S-X.** Calculated (blue, lower) and measured (red, upper) powder XRD powder patterns for  $[\text{Co}(\text{phen})(\text{EDPA})(\text{H}_2\text{O})_2]_\infty$  (**1a**).

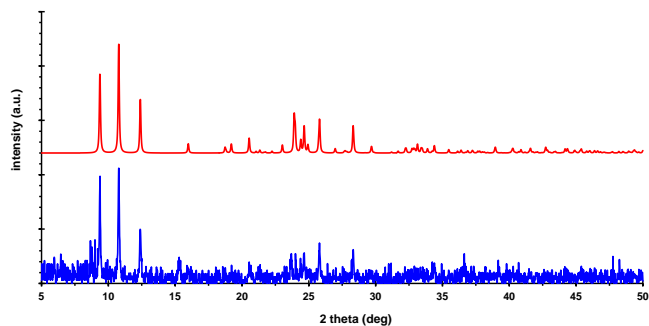

**Figure S-X.** Calculated (red, upper) and measured (blue, lower) powder XRD powder patterns for  $\{[\text{Cu}(\text{phen})(\text{MDPA})] \cdot \text{H}_2\text{O}\}_\infty$  (**2**)

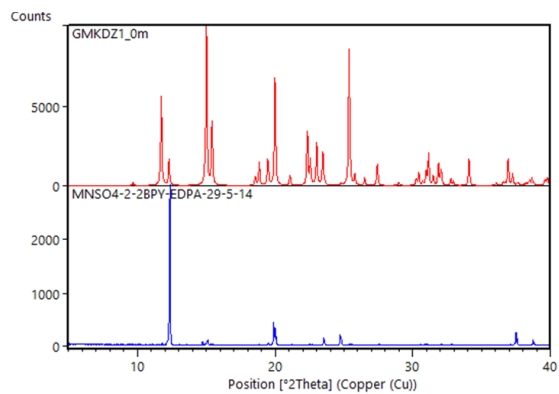

**Figure S-X.** Calculated (red, upper) and measured (blue, lower) powder XRD powder patterns for  $[\text{Mn}(\text{bpy})(\text{EDPA})(\text{H}_2\text{O})_2]_\infty$  (**3**).

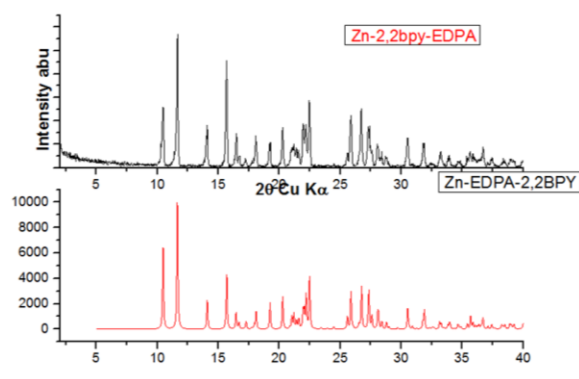

**Figure S-X.** Calculated (red, lower) and measured (black, upper) powder XRD powder patterns for  $[\text{Zn}(\text{bpy})(\text{EDPA})]_\infty$  (**4**).

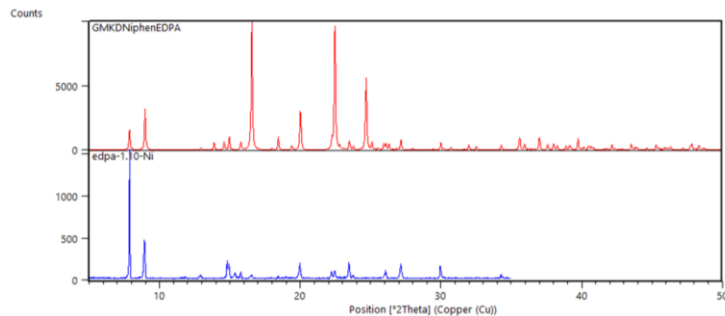

**Figure S-X.** Calculated (red, upper) and measured (blue, lower) powder XRD powder patterns for  $[\text{Ni}(\text{phen})(\text{H}_2\text{O})_4](\text{EDPA})$  (**5**).
